# Supplementary material for: The long noncoding RNA Synage regulates synapse stability and neuronal function in the cerebellum
Source: PubMed Central journal article supplement (PMC8408218; doi:10.1038/s41418-021-00774-3), 2021-03-24
Supplement: 41418_2021_774_MOESM1_ESM.pdf [file 41418_2021_774_MOESM1_ESM.pdf]

# Supplemental Data for

## The long noncoding RNA *Synage* regulates synapse stability and neuronal function in the cerebellum

Fei Wang<sup>†</sup>, Qianqian Wang<sup>†</sup>, Baowei Liu<sup>†</sup>, Lisheng Mei, Sisi Ma, Shujuan Wang, Ruoyu Wang, Yan Zhang, Chaoshi Niu, Zhiqi Xiong, Yong Zheng, Zhi Zhang, Juan Shi, and Xiaoyuan Song\*

<sup>†</sup>These authors contributed equally to this work.

\*Corresponding author. Email: [songxy5@ustc.edu.cn](mailto:songxy5@ustc.edu.cn)

### This PDF file includes:

Supplemental Figures S1-S11

Supplemental Tables S1-S3

17 **Supplemental Figure S1 (related to Figure 1)**

18

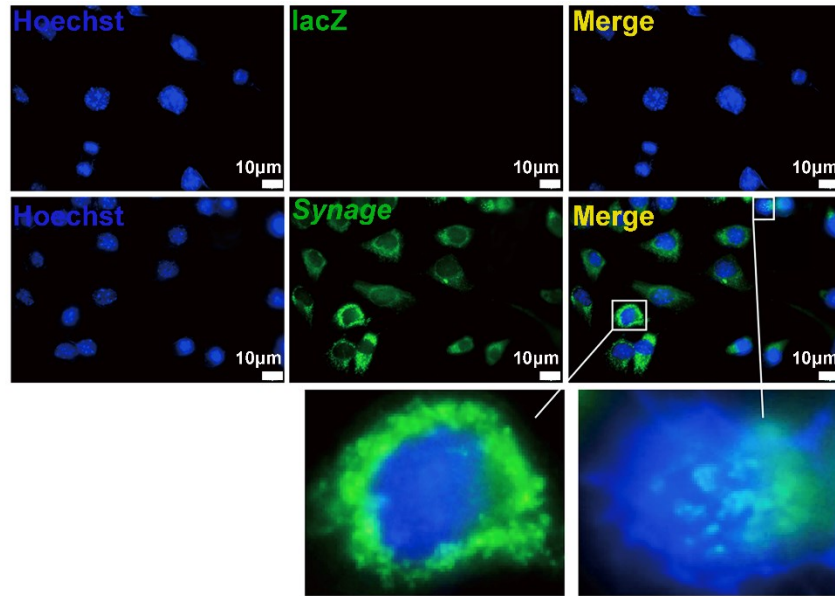

19

20

21 **Fig. S1 Distribution of *Synage* lncRNA in the C8-D1A cell line.** RNA FISH of *Synage* (green)  
22 in the C8-D1A cerebellum cell line, lacZ probe (green) was used as a negative control. Nuclei were  
23 stained with Hoechst 33342 (blue). Scale bar: 10  $\mu$ m.

24

25 **Supplemental Figure S2 (related to Figure 1)**

26

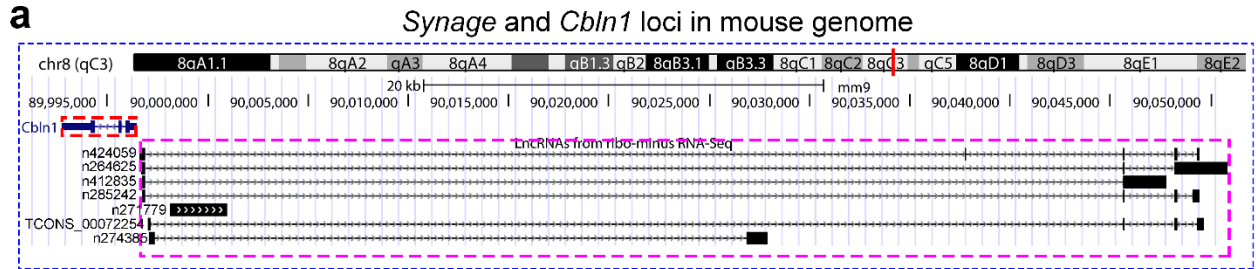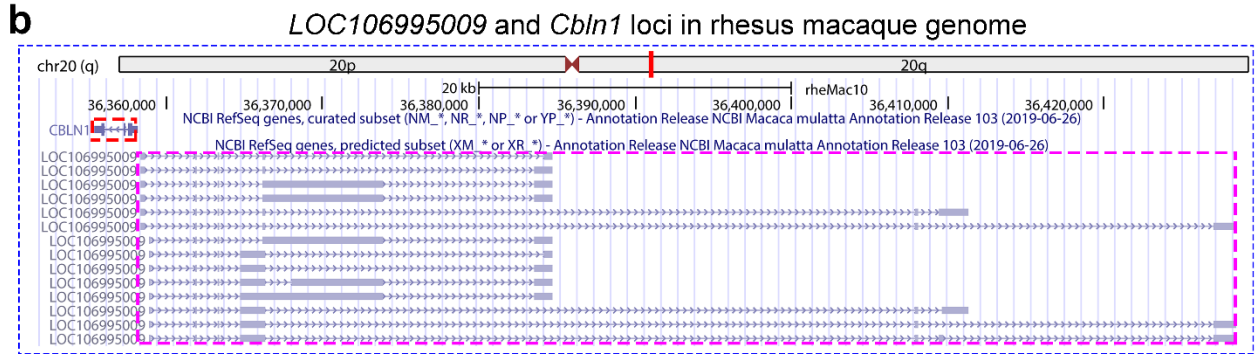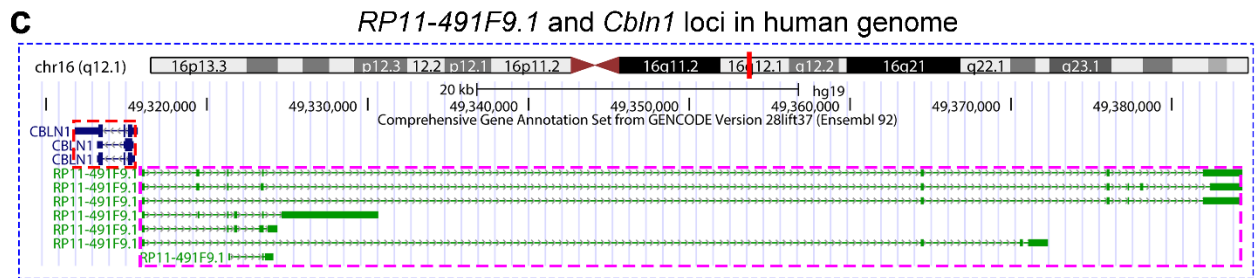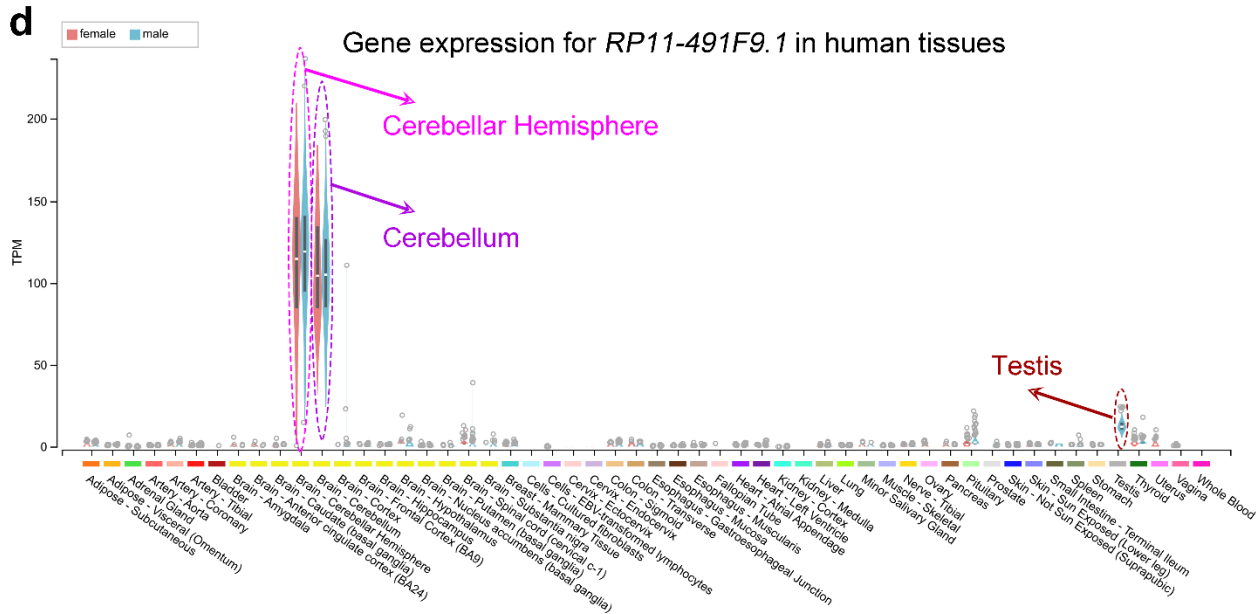

27

28

29 **Fig. S2 *Synage* lncRNA is conserved in its genomic location and in its distribution specificity**  
30 **in the cerebellum. a** Schematic view of the genomic loci of the *Synage* transcripts in the mouse  
31 brains detected by ribo-minus RNA-Seq. **b and c** Schematic view of the genomic loci of the  
32 homologous *Synage*, *LOC106995009* and *RP11-491F9.1*, in the rhesus macaque (**b**) and human  
33 genomes (**c**), respectively. The *Cbln1* gene is shown in the red box. The genomic loci of both *Synage*  
34 in the mouse and homologous *Synage* in the rhesus macaque and human are shown in the purple  
35 box. **d** Gene expression level for *RP11-491F9.1* in human tissues screened from the GTEx project  
36 database (dbGaP Accession phs000424.v8.p2).

37 **Supplemental Figure S3 (related to Figure 1)**

38

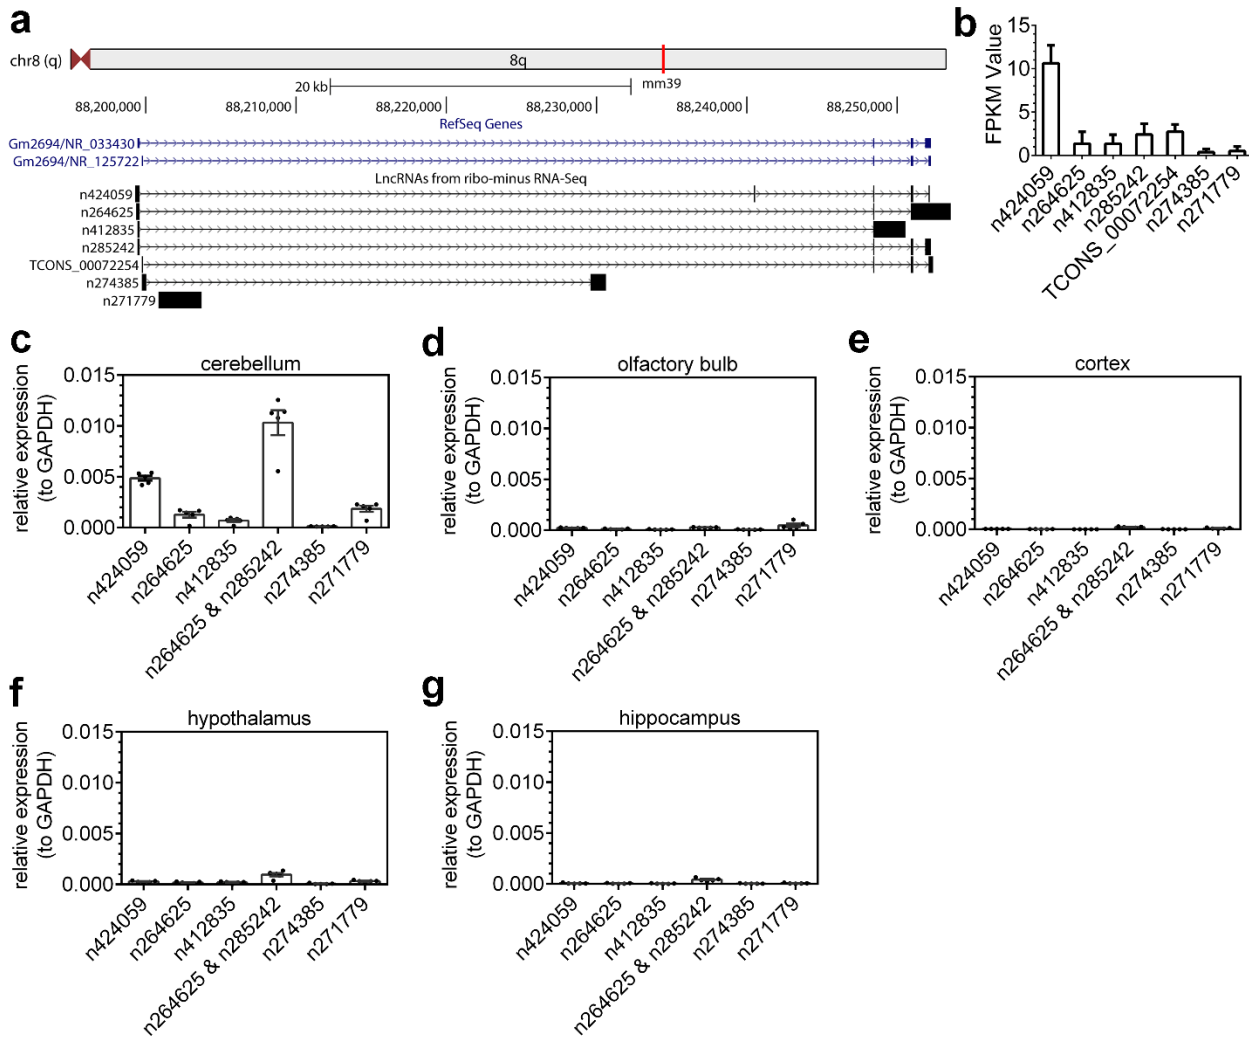

39

40

41 **Fig. S3 The expression level of the mouse *Synage* transcripts in different brain regions. a**  
 42 **Schematic view of *Synage* transcripts detected by ribo-minus RNA-Seq. b FPKM (Fragments Per**  
 43 **Kilobase Million) value of the *Synage* transcripts in the whole brains of 2-month-old mice detected**  
 44 **by ribo-minus RNA-Seq (n=3). c-g The relative expression level of the *Synage* transcripts in the**  
 45 **adult mouse cerebellum (c), olfactory bulb (d), cortex (e), hypothalamus (f), and hippocampus (g),**  
 46 **detected by RT-qPCR (n=5). The sequence of n264625 overlaps with most of the sequence of**  
 47 **n285242, so that a RT-qPCR primer pair specifically targeting n285242 was unable to be designed,**  
 48 **but a RT-qPCR primer pair specifically targeting both n285242 and n264625 can be designed, so**  
 49 **does a RT-qPCR primer pair specifically targeting n264625. The expression level of n285242 was**  
 50 **estimated indirectly by removing the expression level of n264625 transcript from the total**  
 51 **expression level of n285242 and n264625 transcripts detected by RT-qPCR.**

52

53 Supplemental Figure S4 (related to Figure 1)

54

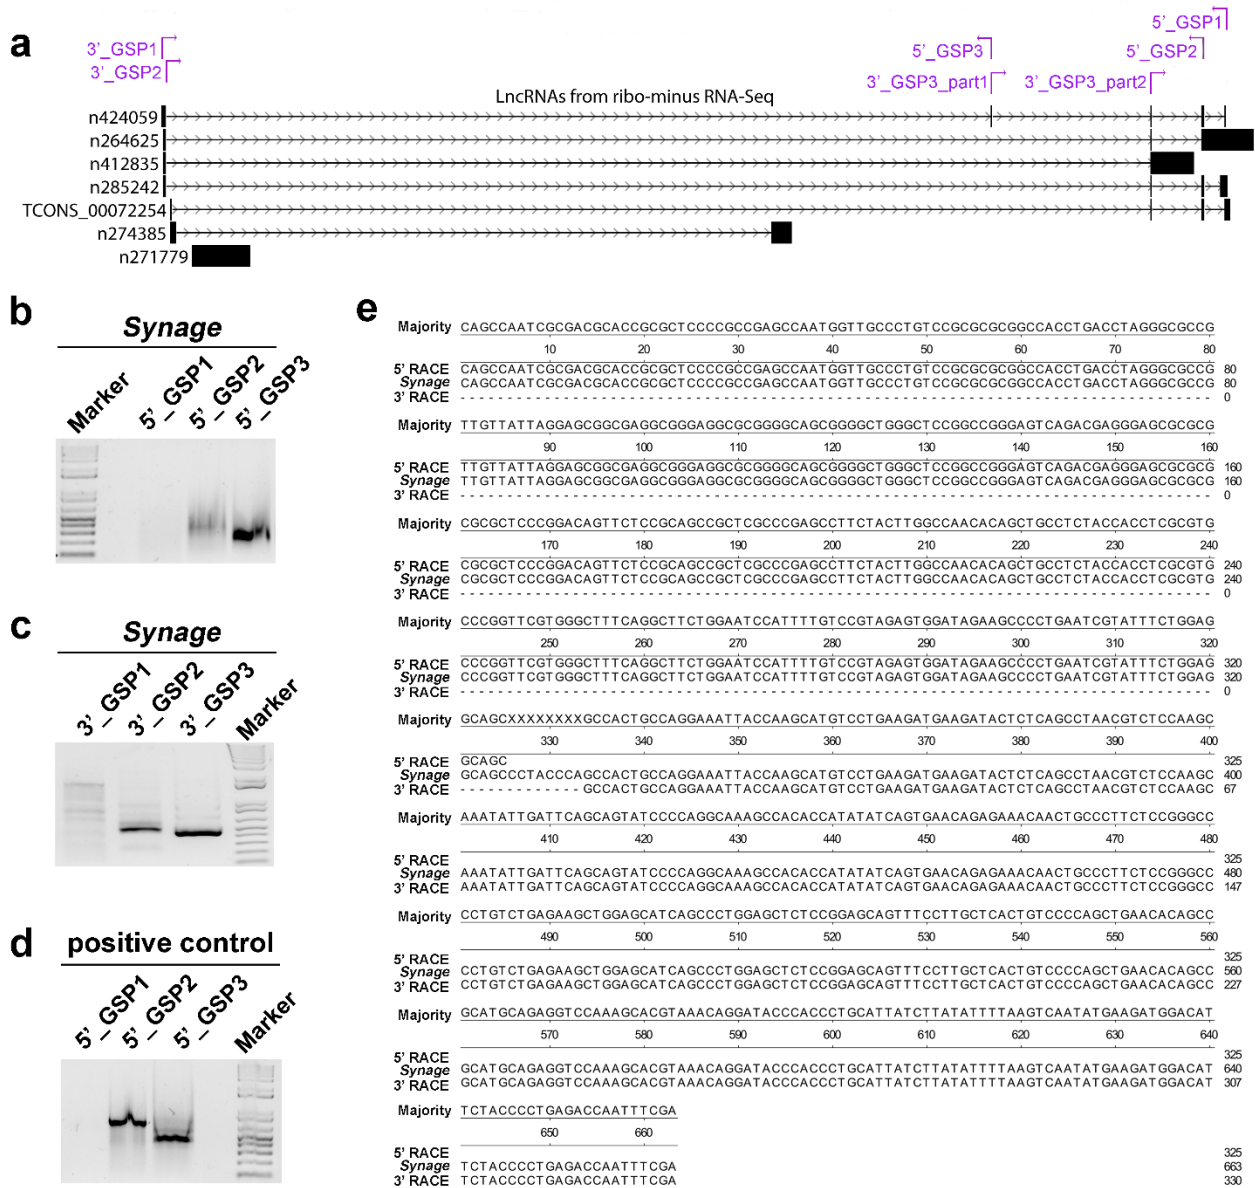

55

56

57 **Fig. S4 The characterization of the full length mouse *Synage* lncRNA.** **a** The position of gene  
 58 specific primers (GSPs) targeting *Synage* in the 5'- and 3'-RACE experiments. **b-d** The 5'- (**b**) and  
 59 3'-RACE (**c**) PCR amplification of *Synage* fragments using respective GSPs. The 4.8 kb pAMP1  
 60 5'-RACE recombinant was a positive control, which was provided by the commercial 5'-RACE kit  
 61 (**d**). **e** cDNA sequencing and assembling of 5'- and 3'-RACE of *Synage* fragments.

62

63 Supplemental Figure S5 (related to Figure 2)

64

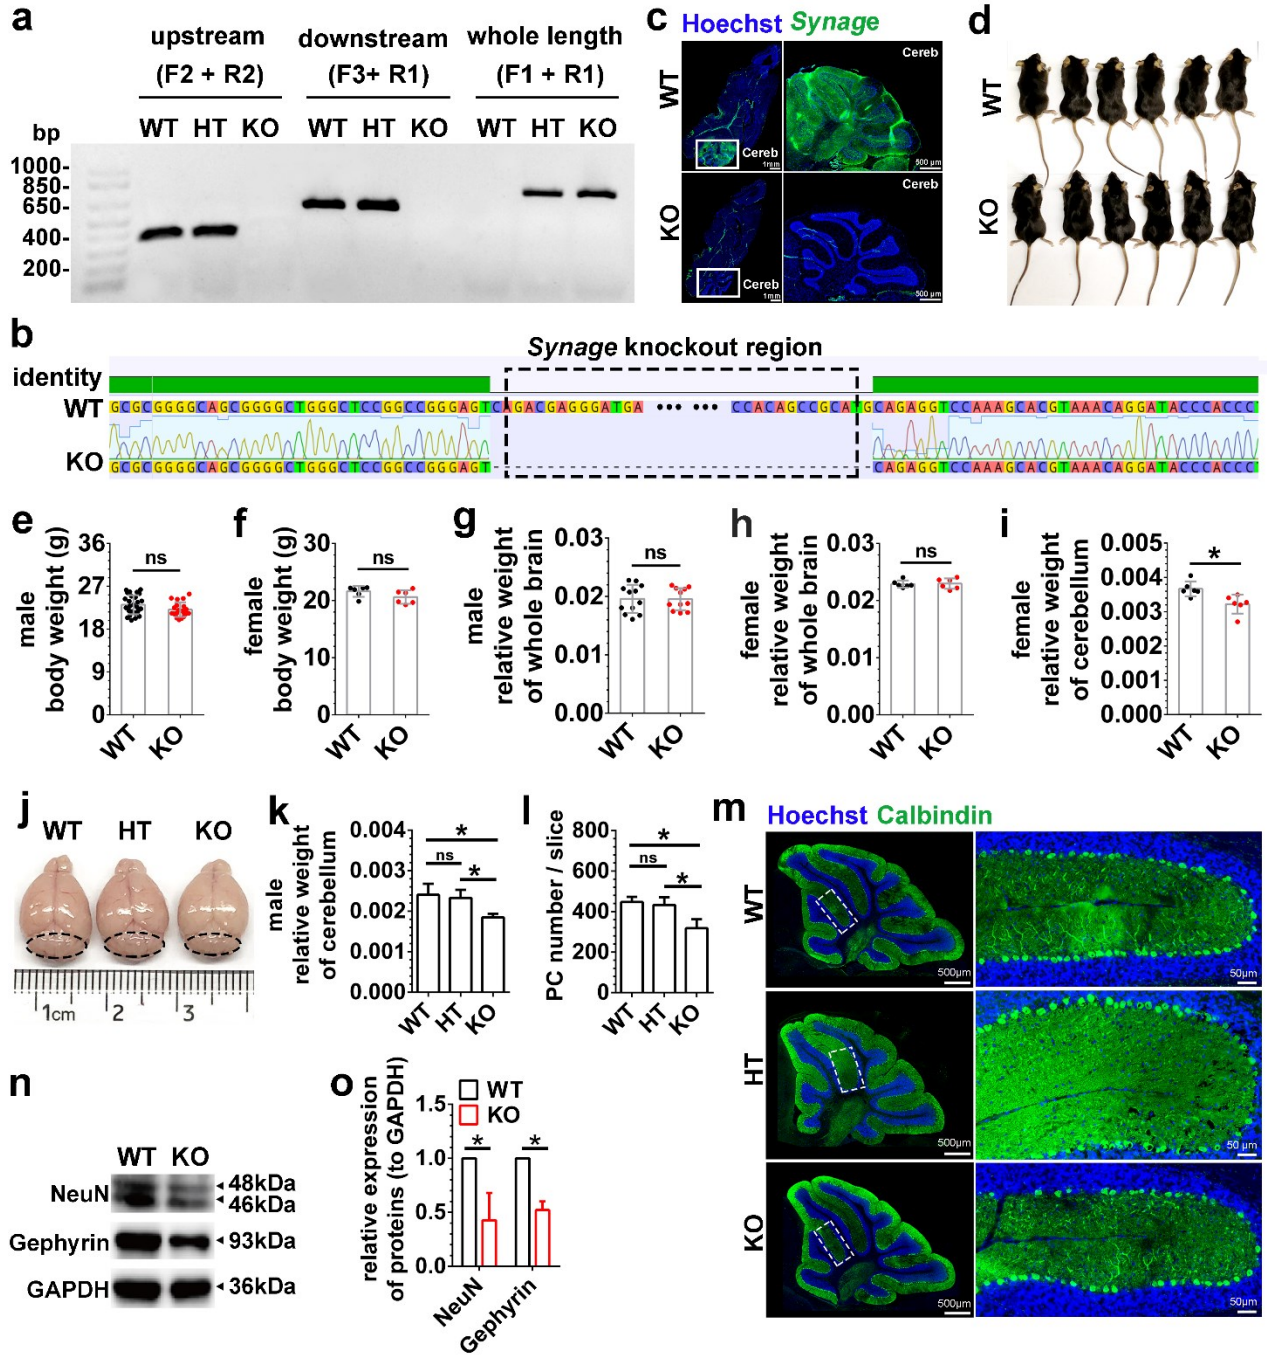

65

66

67 **Fig. S5 *Synage* knockout causes cerebellar atrophy and neuronal loss.** **a** Genotype identification  
68 of *Synage* wild-type (WT), heterozygous (HT), and homozygous (KO) mice by genomic PCR  
69 amplification for *Synage*. **b** Genomic sequencing of *Synage* in WT and *Synage* KO mice. **c** The  
70 distribution of *Synage* (green) in the brain sections of WT and KO adult mice detected by RNA  
71 FISH. Nuclei were stained with Hoechst 33342 (blue). Left scale bar: 1 mm; right scale bar: 500  
72  $\mu\text{m}$ . **d** Representative images of 2-month-old WT and KO male mice. **e and f** Body weights of adult  
73 WT and KO male (**e**) and female (**f**) mice. **g and h** Relative weights of whole brain in adult male  
74 (**g**) and female (**h**) mice. **i** Relative weights of the cerebella in adult female mice, normalized to  
75 body weight, each dot represents a mouse. **j and k** Representative images (**j**) and relative weights  
76 (**k**) of the cerebella of 2-month-old WT, *Synage* HT, and KO male mice, normalized to body weight  
77 (n=3). **l and m** Quantification of the number of Purkinje cells per cerebellar sections (**l**) and  
78 representative immunofluorescence staining images of Purkinje cells (**m**) in the cerebella of adult  
79 WT, *Synage* HT, and KO male mice (n=3). Nuclei were stained with Hoechst 33342 (blue). Left  
80 scale bar: 500  $\mu\text{m}$ ; right scale bar: 50  $\mu\text{m}$ . **n and o** Representative images of Western blots (**n**) and  
81 quantification (**o**) for both NeuN (a neuronal marker) and Gephyrin (an inhibitory postsynaptic  
82 marker) in adult WT and KO mouse cerebella, normalized to GAPDH.

83



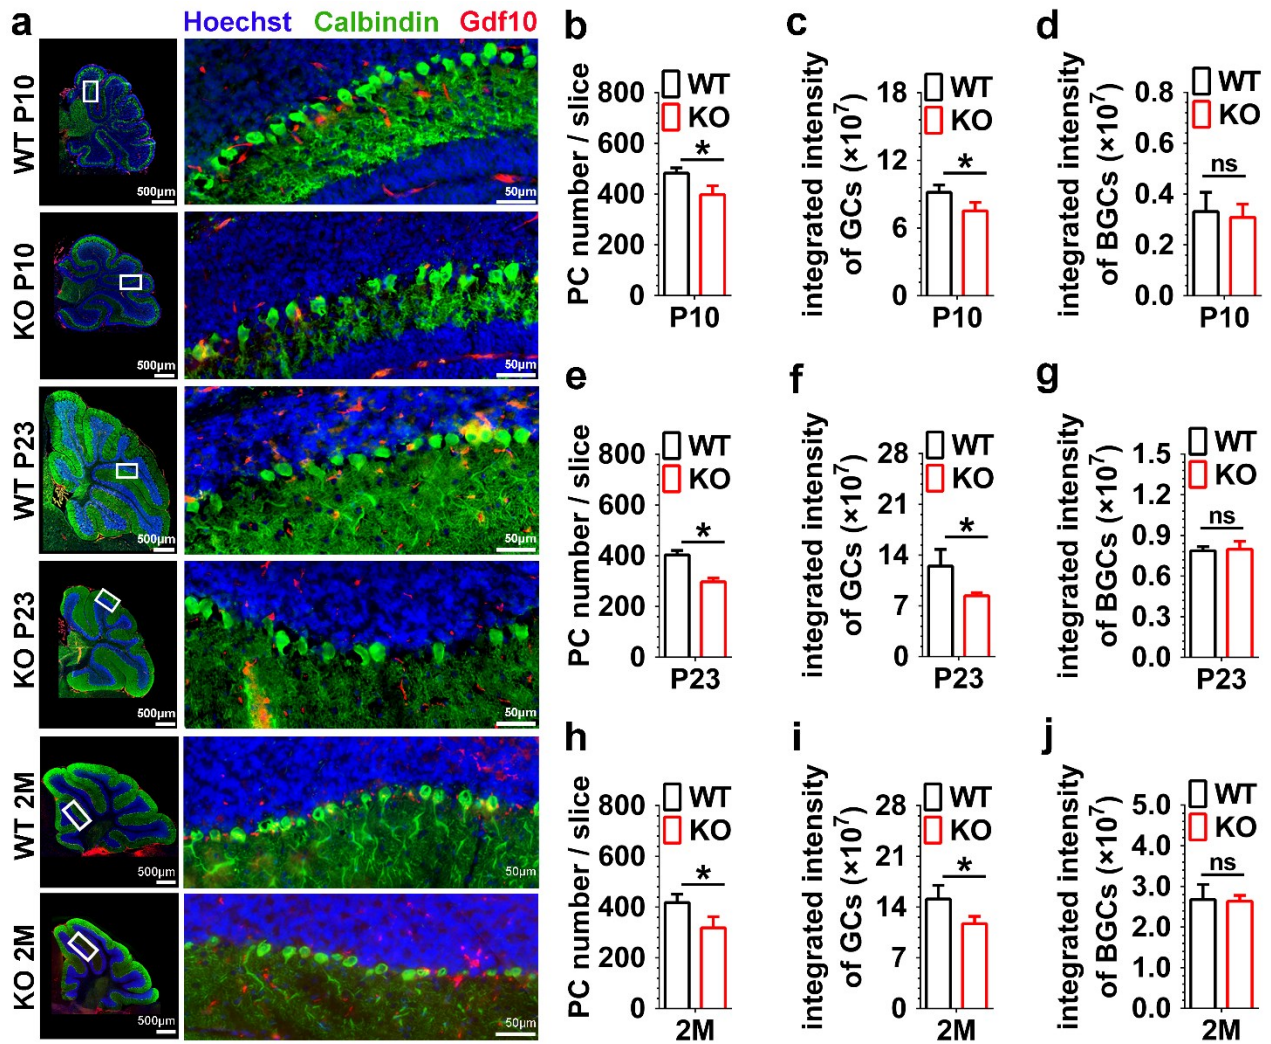

86  
87  
88 **Fig. S6 *Synage* knockout mice show neuronal loss during cerebellar development.** a-j  
89 Representative immunofluorescence staining images (a) and quantification of the number of PCs  
90 (Calbindin, green), the integrated intensity of granule cells (GCs), and the integrated intensity of  
91 Bergmann glial cells (BGCs, Gdf10, red) in the cerebella from P10 (b-d), P23 (e-g), and 2-month-  
92 old (h-j) WT and *Synage* KO mice. Nuclei were stained with Hoechst 33342 (blue). Left scale bar:  
93 500  $\mu\text{m}$ ; right scale bar: 50  $\mu\text{m}$ . The signal intensity of Hoechst 33342 staining in the granule cell  
94 layer was used to estimate GCs.

96 Supplemental Figure S7 (related to Figure 3)

97

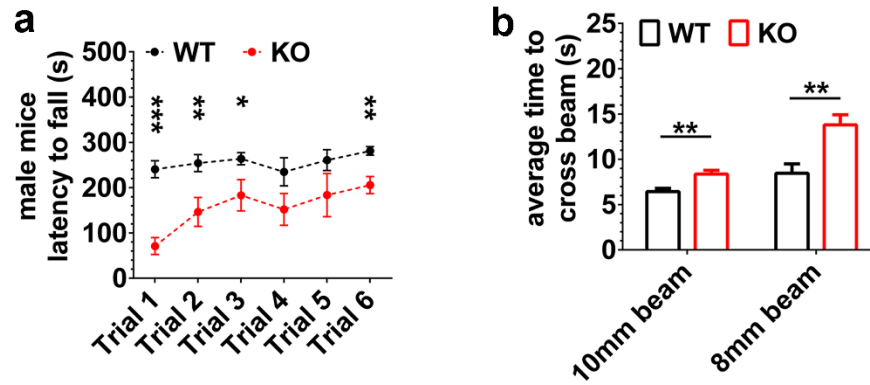

98

99 **Fig. S7 *Synage* knockout impairs motor abilities and motor-dependent learning and memory**

100 **of mice. a** The time(s) that adult mice stayed on the rotarod when tested at constant speeds between

101 4 and 40 rpm before falling in the rotarod test (WT:  $n = 10$ ; KO:  $n = 8$ ).

102 **b** The average time(s) that it took adult mice to cross an 80 cm beam with a flat surface of 10 mm or 8 mm width in the balance

103 beam test (WT:  $n = 12$ ; KO:  $n = 12$ ).

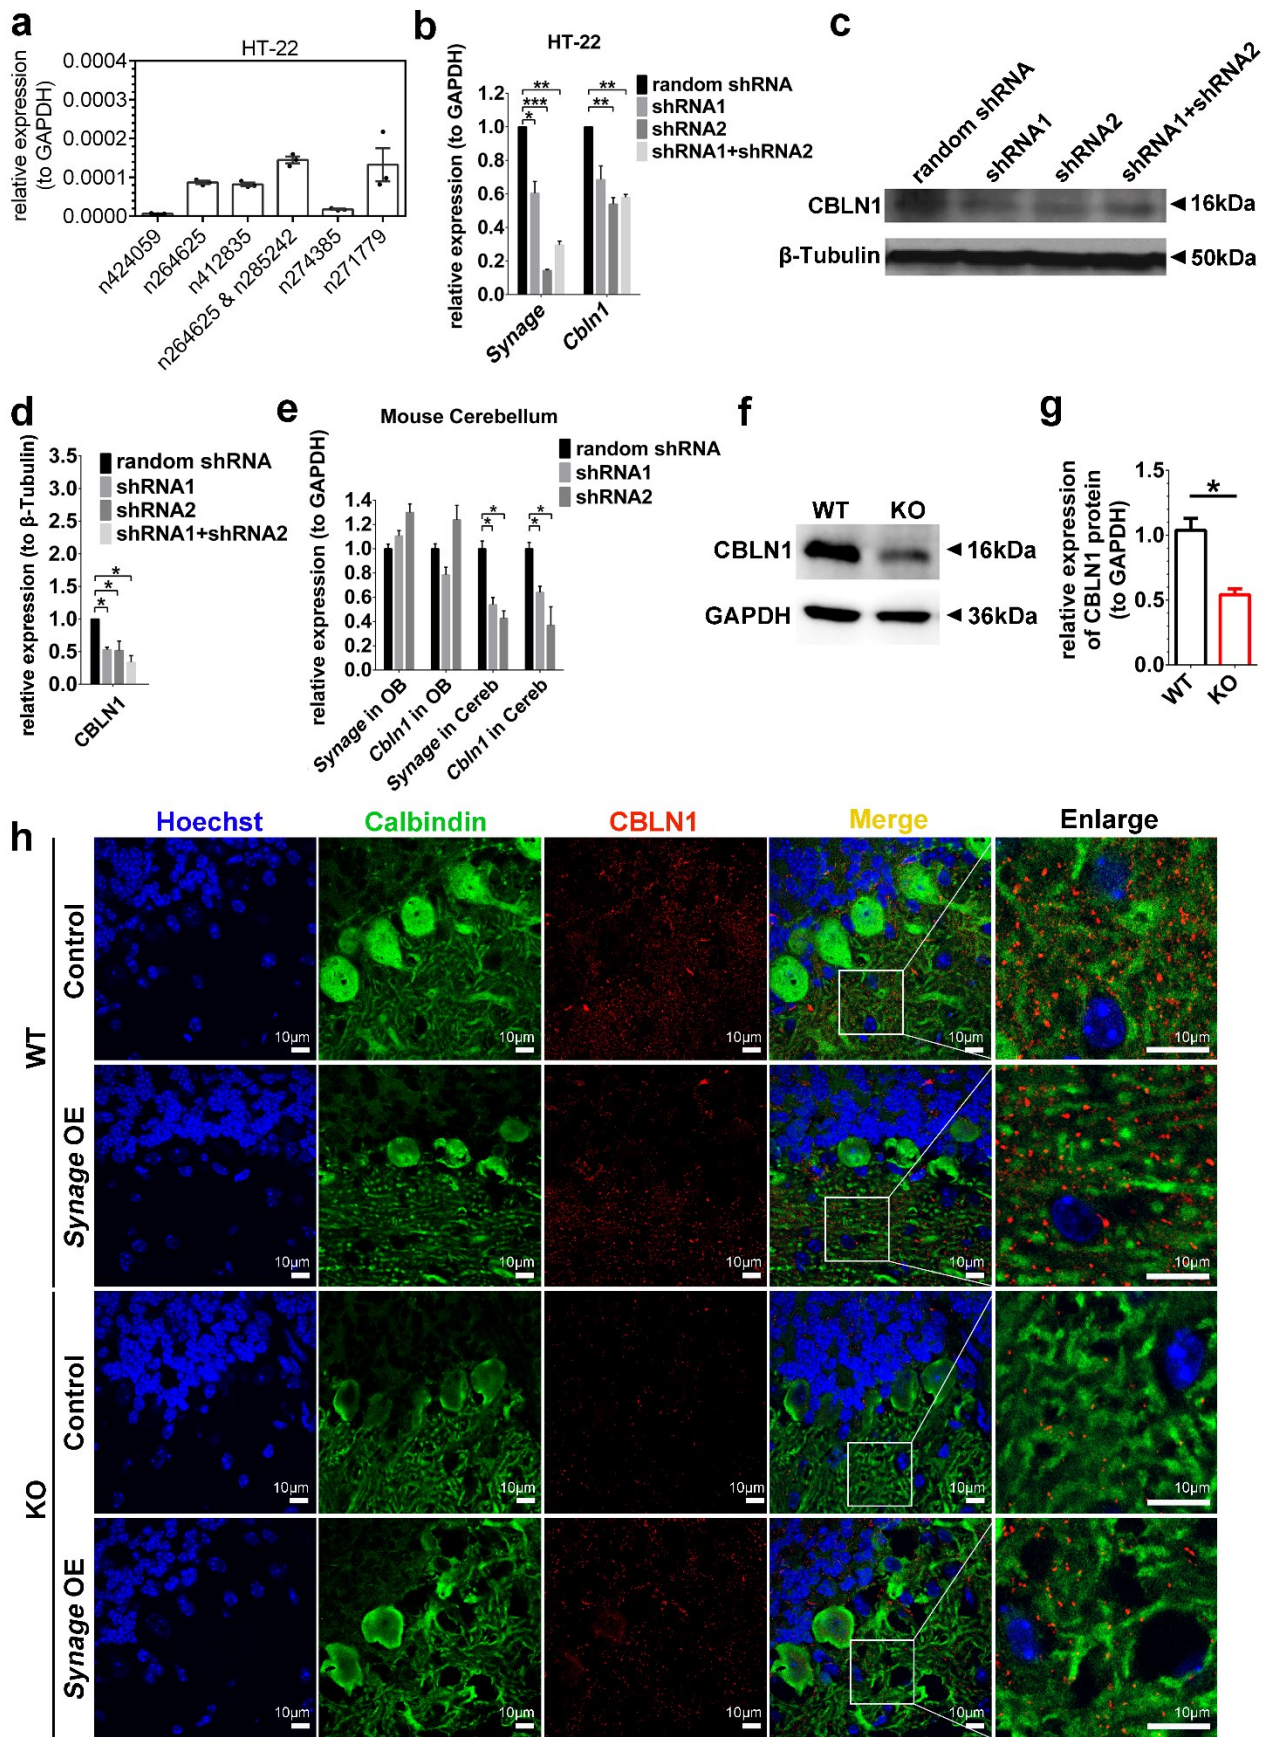

108 **Fig. S8 Knockdown of *Synage* results in substantial reduction in the expression of *Cbln1* in**  
109 ***vitro* and *in vivo*.** **a** Relative expression levels of *Synage* transcripts in the HT-22 cell line detected  
110 by RT-qPCR. **b** Relative expression levels of *Synage* lncRNA and *Cbln1* mRNA after *Synage*  
111 shRNA knockdown in the HT-22 cell line detected by RT-qPCR. **c and d** Western blot analysis (**c**)  
112 and quantification (**d**) for CBLN1 protein in the HT-22 cell line following *Synage* knockdown,  
113 normalized to  $\beta$ -Tubulin. **e** Relative expression levels of *Synage* lncRNA and *Cbln1* mRNA after  
114 *Synage* shRNA knockdown in the mouse cerebella detected by RT-qPCR (OB, olfactory bulb;  
115 Cereb, cerebellum). **f and g** Representative images of Western blot (**f**) and quantified expression  
116 level (**g**) of CBLN1 protein, normalized to GAPDH, in 2-month-old WT and KO mice. **h**  
117 Representative confocal images of CBLN1 with Calbindin by immunofluorescence staining in 3-  
118 week-old WT and KO mouse cerebella after stereotaxic injection of AAV-control or AAV-*Synage*  
119 into the neonatal mouse cerebella. Scale bar: 10  $\mu$ m.  
120

121 Supplemental Figure S9 (related to Figure 5)

122

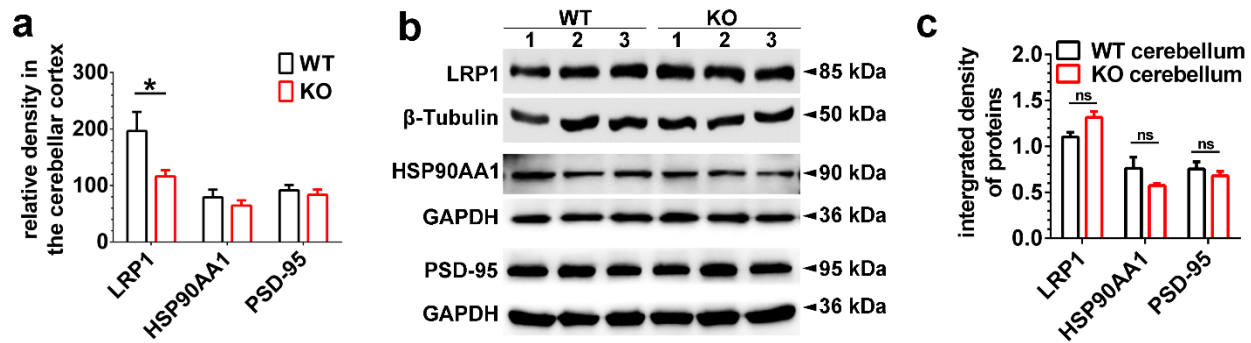

123

124

125 **Fig. S9 Identification and verification of *Synage*-binding proteins.** **a** Relative quantification of  
126 LRP1, HSP90AA1, and PSD-95 in the cerebellar cortex of 2-month-old WT and KO mice detected  
127 by immunofluorescence staining of the related proteins. **b-c** Western blots (**b**) and relative  
128 quantification (**c**) for LRP1, HSP90AA1, and PSD-95 proteins in the WT and KO mouse cerebella  
129 (n=3).

130

131 **Supplemental Figure S10 (related to Figure 5)**

132

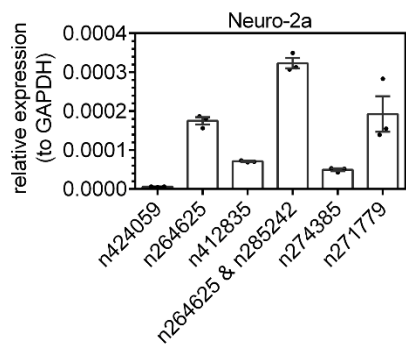

133

134

135 **Fig. S10** Relative expression levels of *Synage* transcripts in the Neuro-2a cell line detected by  
136 **RT-qPCR.**

137

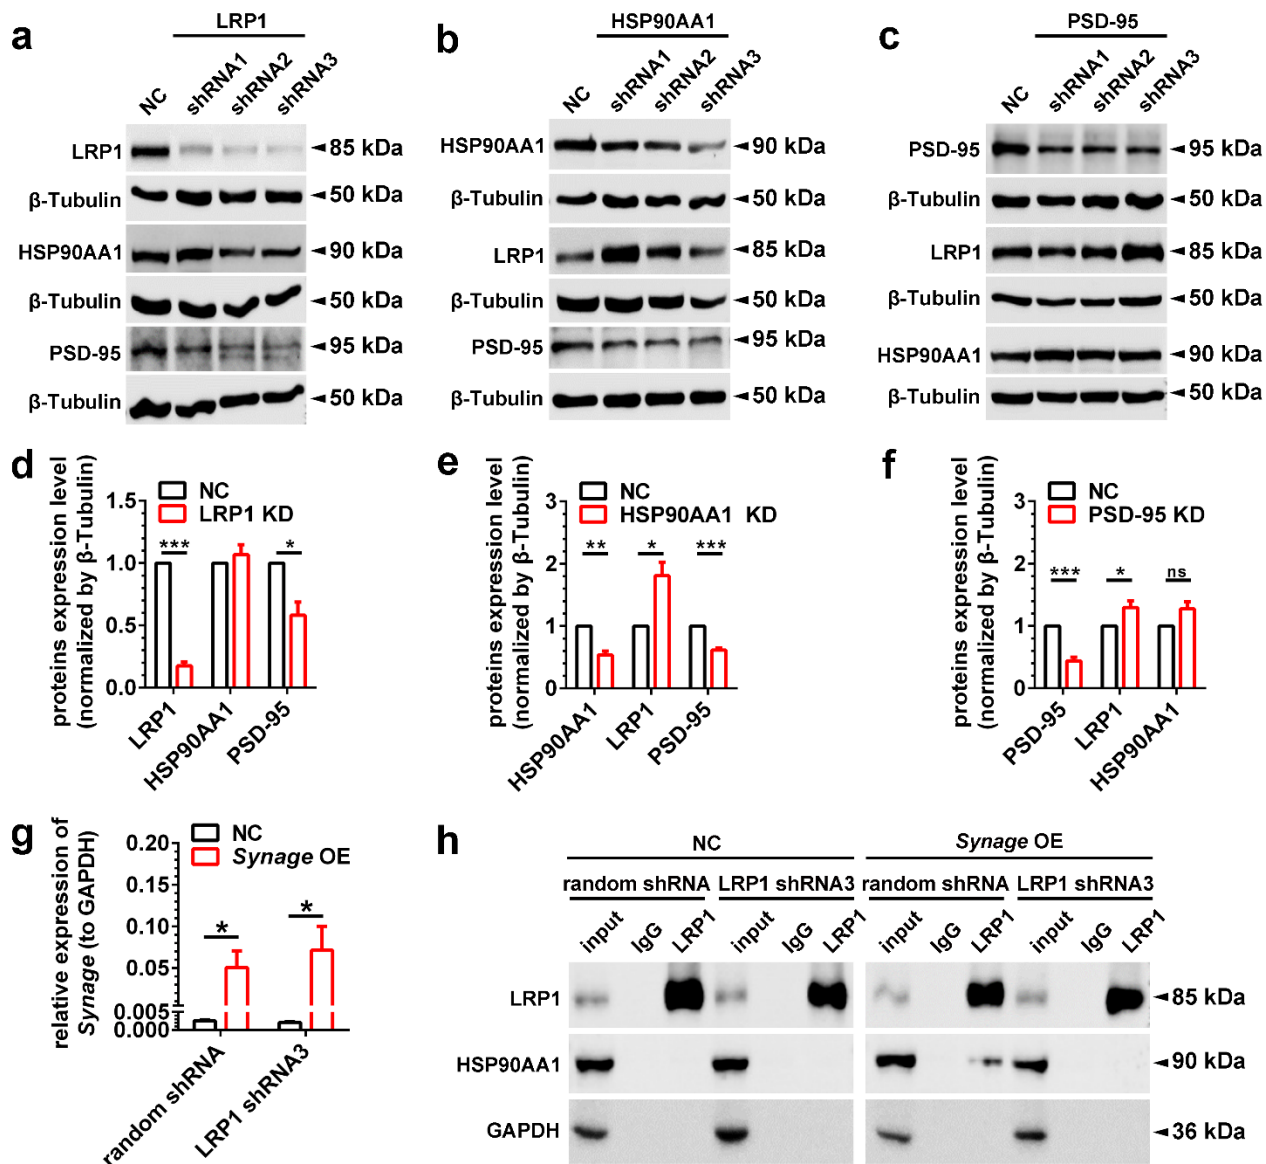

140

141

142 **Fig. S11 LRP1 depletion inhibits the interaction between LRP1-HSP90AA1 and *Synage*.** a-f  
 143 Western blots (a-c) and quantification (d-f) for knockdown analyses of LRP1 (a, d), HSP90AA1  
 144 (b, e), and PSD-95 (c, f) protein in the HT-22 cell line following each protein knockdown,  
 145 normalized to  $\beta$ -Tubulin. g The expression level of *Synage* lncRNA after LRP1 knockdown and  
 146 *Synage* overexpression in the HT-22 cell line detected by RT-qPCR. h Western blots assessing  
 147 LRP1 and HSP90AA1 immunoprecipitation (IP) by anti-LRP1 antibody after LRP1 knockdown  
 148 and *Synage* overexpression in the HT-22 cell line.

149

**Supplemental Table S1. AGO2 CLIP-Seq peak information in mouse cortex**

| <b>AGO2 CLIP-Seq peak information in mouse cortex (screened from GSE73058, Moore et al., 2015)</b> |        |            |            |         |                        |
|----------------------------------------------------------------------------------------------------|--------|------------|------------|---------|------------------------|
| Chromosome                                                                                         | Strand | Start      | End        | Peak.ID | Gene symbol            |
| chr8                                                                                               | -      | 89,992,794 | 89,992,854 | 200144  | <i>Cbhl1</i>           |
|                                                                                                    | -      | 89,992,926 | 89,992,986 | 200161  | <i>Cbhl1</i>           |
|                                                                                                    | -      | 89,993,134 | 89,993,194 | 200186  | <i>Cbhl1</i>           |
|                                                                                                    | -      | 89,993,267 | 89,993,327 | 200198  | <i>Cbhl1</i>           |
|                                                                                                    | -      | 89,993,327 | 89,993,387 | 200212  | <i>Cbhl1</i>           |
|                                                                                                    | -      | 89,993,503 | 89,993,563 | 200243  | <i>Cbhl1</i>           |
|                                                                                                    | -      | 89,993,797 | 89,993,857 | 200292  | <i>Cbhl1</i>           |
|                                                                                                    | -      | 89,993,904 | 89,993,964 | 200314  | <i>Cbhl1</i>           |
|                                                                                                    | -      | 89,994,005 | 89,994,065 | 200330  | <i>Cbhl1</i>           |
|                                                                                                    | -      | 89,994,208 | 89,994,268 | 200347  | <i>Cbhl1</i>           |
|                                                                                                    | -      | 89,995,646 | 89,995,706 | 200385  | <i>Cbhl1</i>           |
|                                                                                                    | -      | 89,995,883 | 89,995,943 | 200408  | <i>Cbhl1</i>           |
|                                                                                                    | -      | 89,996,015 | 89,996,075 | 200437  | <i>Cbhl1</i>           |
|                                                                                                    | +      | 90,016,211 | 90,016,271 | 142479  | <i>Synage (Gm2694)</i> |
|                                                                                                    | +      | 90,022,615 | 90,022,675 | 142568  | <i>Synage (Gm2694)</i> |
|                                                                                                    | +      | 90,028,588 | 90,028,648 | 142659  | <i>Synage (Gm2694)</i> |
|                                                                                                    | +      | 90,038,866 | 90,038,926 | 142745  | <i>Synage (Gm2694)</i> |



153

**Supplemental Table S2. Phenotypes of knockout mice**

154

| <b>Phenotypes</b>                     | <b><i>Synage</i><sup>-/-</sup><br/>mice</b> | <b><i>Cbln1</i><sup>-/-</sup><br/>mice<sup>(1-3)</sup></b> | <b><i>LRPI</i><sup>-/-</sup><br/>mice<sup>(4, 5)</sup></b> |
|---------------------------------------|---------------------------------------------|------------------------------------------------------------|------------------------------------------------------------|
| Decreased synaptic vesicles           | +                                           | -                                                          | NA                                                         |
| Impaired synaptic function            | +                                           | +                                                          | +                                                          |
| Synaptic loss                         | +                                           | +                                                          | +                                                          |
| Neuronal loss                         | +                                           | -                                                          | +                                                          |
| Abnormal electrophysiology            | +                                           | +                                                          | +                                                          |
| Motor dysfunction and memory deficits | +                                           | +                                                          | +                                                          |
| Reduced fertility                     | +                                           | -                                                          | +                                                          |
| Decreased cerebellar weight           | +                                           | -                                                          | NA                                                         |

155 Abbreviations: +, present; -, absent; NA, not applicable

156

| Name                                     | Application | Sequence (5'-3')         |
|------------------------------------------|-------------|--------------------------|
| <i>Synage</i> _sgRNA 1                   | CRISPR/Cas9 | TCCGGCCGGGAGTCAGACGA     |
| <i>Synage</i> _sgRNA 2                   | CRISPR/Cas9 | AAGGGCATGGTGGGTTGGCG     |
| <i>Synage</i> _genotype_F1               | genotype    | GAGCCAATGGTTGCCCTGTC     |
| <i>Synage</i> _genotype_F2               | genotype    | ACAAAGGCGCGGATCAAGC      |
| <i>Synage</i> _genotype_F3               | genotype    | GGATACCCACCCTGCATTATC    |
| <i>Synage</i> _genotype_R1               | genotype    | AACTCCACTGTTACTGCTAATACA |
| <i>Synage</i> _genotype_R2               | genotype    | CTCCTACCTGAAAGCCCACGAA   |
| <i>GAPDH</i> _F                          | RT_qPCR     | ACATCATCCCTGCATCCACTG    |
| <i>GAPDH</i> _R                          | RT_qPCR     | CCTGCTTCACCACCTTCTTG     |
| <i>Synage</i> _p1_F                      | RT_qPCR     | ACCAAGCATGTCTGAAGATG     |
| <i>Synage</i> _p1_R                      | RT_qPCR     | CTGGGGATACTGCTGAATCAA    |
| <i>Synage</i> _p2_F                      | RT_qPCR     | ACTCTCAGCCTAACGTCTCCAA   |
| <i>Synage</i> _p2_R                      | RT_qPCR     | GATGCTCCAGCTTCTCAGACAG   |
| <i>Cbln1</i> _F                          | RT_qPCR     | CTGGCTGTATTCCGTATT       |
| <i>Cbln1</i> _R                          | RT_qPCR     | ACAAGCATCAGAGAACAA       |
| mmu-mir-325-3p_F                         | RT_qPCR     | TTAGCGTTAGCGTTTATTGAGCAC |
| mmu-mir-325-3p_R                         | RT_qPCR     | TATGGTTGTTACGAGTCCTTGTC  |
| <i>U6</i> _F                             | RT_qPCR     | ATTGGAACGATACAGAGAAGATT  |
| <i>U6</i> _R                             | RT_qPCR     | GGAACGCTTCACGAATTTG      |
| n424059_F                                | RT_qPCR     | TCGCCCCGAGCCTTCTACTTG    |
| n424059_R                                | RT_qPCR     | CAGGGGCTTCTATCCACTCTAC   |
| n264625 ( <i>Synage</i> -P1)_F           | RT_qPCR     | GATTCAGCTCGCTCACACCT     |
| n264625 ( <i>Synage</i> -P1)_R           | RT_qPCR     | CATTGTGCATGTAGCAGCGAA    |
| n412835_F                                | RT_qPCR     | TGCTGATAACCCACCTTGGC     |
| n412835_R                                | RT_qPCR     | AAGACCGCACCACAATCCAT     |
| n264625 & n285242 ( <i>Synage</i> -P2)_F | RT_qPCR     | AGAGAAACAACCTGCCCTTCTCC  |
| n264625 & n285242 ( <i>Synage</i> -P2)_R | RT_qPCR     | TTCTGAGCAGGCAGTATCC      |
| n274385_F                                | RT_qPCR     | GTGAAACTACATCCACGCCCA    |
| n274385_R                                | RT_qPCR     | CTGACCGTTGTTCTAACGCA     |
| n271779_F                                | RT_qPCR     | ACGTACCCTGCACACACATA     |
| n271779_R                                | RT_qPCR     | GCCAAAGCCCCAGCTAATA      |
| <i>Cbln1</i> _NRO_F1                     | NRO         | GTCTACAACAGACAGACCATCC   |
| <i>Cbln1</i> _NRO_R1                     | NRO         | CACTGATTTCTGACGCTTG      |
| <i>Cbln1</i> _NRO_F2                     | NRO         | ATCAGGAGCACCAACCATGA     |
| <i>Cbln1</i> _NRO_R2                     | NRO         | CAATCCATTCTGGGTGCTGC     |
| <i>Gm2694</i> _NRO_F1                    | NRO         | AACACAGCTGCCTCTACCAC     |
| <i>Gm2694</i> _NRO_R1                    | NRO         | TCGGCGCGATGCTGCACT       |
| <i>Gm2694</i> _NRO_F2                    | NRO         | AGTGCTGCTTGTTCGAACCCAT   |
| <i>Gm2694</i> _NRO_R2                    | NRO         | TCTTCATCTTCAGGACATGC     |
| <i>Gm2694</i> _NRO_F3                    | NRO         | TGTCTGAGAAGCTGGAGCATCA   |
| <i>Gm2694</i> _NRO_R3                    | NRO         | GAACGGGAGTAGATCTGAC      |
| <i>HPRT</i> _NRO_F1                      | NRO         | GCTTCCTCCTCAGACCGCTT     |
| <i>HPRT</i> _NRO_R1                      | NRO         | TCTGCTGGAGTCCCCTTG       |
| <i>HPRT</i> _NRO_F2                      | NRO         | GGAATGTGCTCTGTAAAAGT     |
| <i>HPRT</i> _NRO_R2                      | NRO         | CTCCATCTCCTTCATGACA      |
| <i>HPRT</i> _NRO_F3                      | NRO         | CAGACAACGTAGGAGGAC       |
| <i>HPRT</i> _NRO_R3                      | NRO         | CCAGTTTCACTAATGACAC      |
| <i>Synage</i> _3'RACE_GSP1               | RACE        | CAGCCAATCGCGACGAC        |
| <i>Synage</i> _3'RACE_GSP2               | RACE        | GGCCAACACAGCTGCCTCTAC    |
| <i>Synage</i> _3'RACE_GSP3               | RACE        | GCCACTGCCAGGAAATTACCAAG  |
| <i>Synage</i> _5'RACE_GSP1               | RACE        | TCGAAATTGGTCTCAGGGGT     |
| <i>Synage</i> _5'RACE_GSP2               | RACE        | CTGATGCTCCAGCTTCTCAGACAG |
| <i>Synage</i> _5'RACE_GSP3               | RACE        | GCTGCCTCCAGAAATACGATTCAG |
| <i>Synage</i> _shRNA1                    | Knockdown   | TCCAGAAATACGATTCAGG      |
| <i>Synage</i> _shRNA2                    | Knockdown   | AGCGCGGTGCGTCGCGATT      |

|                         |           |                               |
|-------------------------|-----------|-------------------------------|
| <i>LRP1</i> _shRNA1     | Knockdown | TTACCAAAGAATGTGTTTCAGC        |
| <i>LRP1</i> _shRNA2     | Knockdown | TTAGCCAGTGTATTTGTTTCGC        |
| <i>LRP1</i> _shRNA3     | Knockdown | TTCATACATCTTGTAGGTAGG         |
| <i>HSP90AA1</i> _shRNA1 | Knockdown | AAACTTAGGGTTGTTCTCGGG         |
| <i>HSP90AA1</i> _shRNA2 | Knockdown | ATCATCCTCATCAATACCTAG         |
| <i>HSP90AA1</i> _shRNA3 | Knockdown | AATGAAATTCAGATACTCAGG         |
| <i>PSD-95</i> _shRNA1   | Knockdown | TATACTGAGCGATGATCGTG          |
| <i>PSD-95</i> _shRNA2   | Knockdown | ACACTGTTGACCGCCAGGATCTTGTCTCC |
| <i>PSD-95</i> _shRNA3   | Knockdown | GAGTCTCTCTCGGGCTGGGACCCAGATGT |

---

159

160

161 **References**

162 1. Uemura T, Lee SJ, Yasumura M, Takeuchi T, Yoshida T, Ra M, et al. Trans-synaptic  
 163 interaction of GluRdelta2 and Neurexin through Cbln1 mediates synapse formation in the  
 164 cerebellum. *Cell*. 2010;141(6):1068-79.

165 2. Rong Y, Wei P, Parris J, Guo H, Pattarini R, Correia K, et al. Comparison of Cbln1 and  
 166 Cbln2 functions using transgenic and knockout mice. *J Neurochem*. 2012;120(4):528-40.

167 3. Hirai H, Pang Z, Bao D, Miyazaki T, Li L, Miura E, et al. Cbln1 is essential for synaptic  
 168 integrity and plasticity in the cerebellum. *Nat Neurosci*. 2005;8(11):1534-41.

169 4. Liu Q, Trotter J, Zhang J, Peters MM, Cheng H, Bao J, et al. Neuronal LRP1 knockout in  
 170 adult mice leads to impaired brain lipid metabolism and progressive, age-dependent synapse loss  
 171 and neurodegeneration. *J Neurosci*. 2010;30(50):17068-78.

172 5. May P, Rohlmann A, Bock HH, Zurhove K, Marth JD, Schomburg ED, et al. Neuronal  
 173 LRP1 functionally associates with postsynaptic proteins and is required for normal motor function  
 174 in mice. *Mol Cell Biol*. 2004;24(20):8872-83.

175
